# Supplementary material for: Outcomes of Hospital-Acquired Hypernatremia
Source: PubMed Central journal article supplement — Clin J Am Soc Nephrol. 2023 Sep 18;18(11):1396–407. doi: 10.2215/CJN.0000000000000250 (PMC10637455; doi:10.2215/cjn.0000000000000250), 2023-09-18

## **Supplemental Material**

Supplemental Table 1. Profile of serum sodium levels and outcomes stratified by eGFR.

Supplemental Table 2. Profile of serum sodium levels and outcomes stratified by kidney dysfunction status.

Supplemental Figure 1: Plot of relationships between serum sodium levels during hospital stay and length of hospitalization among those discharged to home stratified by eGFR.

**Supplemental Table 1. Profile of serum sodium levels and outcomes stratified by eGFR.**

| <b>Natremia Categories</b>    |                 | <b>In-Hospital Mortality<br/>(n=27,482)</b> | <b>Discharge to Hospice<br/>(n=10,238)</b> | <b>Discharge to Nursing Facility<br/>(n=153,695)</b> |
|-------------------------------|-----------------|---------------------------------------------|--------------------------------------------|------------------------------------------------------|
|                               |                 | <b>N (%)</b>                                | <b>N (%)</b>                               | <b>N (%)</b>                                         |
| <b>Normonatremia</b>          |                 | 19,988 (1.2)                                | 9,887 (0.6)                                | 152,369 (9.4)                                        |
| <b>Hypernatremia</b>          | <b>Mild</b>     | 6,750 (7.7)                                 | 1,512 (1.7)                                | 21,623 (24.6)                                        |
|                               | <b>Moderate</b> | 3,298 (25.4)                                | 334 (2.6)                                  | 3,743 (28.8)                                         |
|                               | <b>Severe</b>   | 2,577 (47.0)                                | 89 (1.6)                                   | 1,287 (23.5)                                         |
| <b>eGFR</b>                   |                 |                                             |                                            |                                                      |
| <b>Normonatremia</b>          | <b>&lt;15</b>   | 1,438 (7.4)                                 | 320 (3.3)                                  | 2,847 (1.9)                                          |
|                               | <b>15-29</b>    | 2,994 (15.5)                                | 815 (8.4)                                  | 11,307 (7.6)                                         |
|                               | <b>30-59</b>    | 6,674 (34.6)                                | 2,826 (29.3)                               | 52,245 (35.0)                                        |
|                               | <b>60-89</b>    | 5,940 (30.8)                                | 3,476 (36.0)                               | 60,933 (40.8)                                        |
|                               | <b>≥ 90</b>     | 2,265 (11.7)                                | 2,213 (22.9)                               | 22,115 (14.8)                                        |
| <b>Mild Hypernatremia</b>     | <b>&lt;15</b>   | 410 (3.4)                                   | 87 (4.6)                                   | 1,167 (4.5)                                          |
|                               | <b>15-29</b>    | 994 (8.2)                                   | 234 (12.4)                                 | 3,473 (13.3)                                         |
|                               | <b>30-59</b>    | 2,466 (20.4)                                | 549 (29.0)                                 | 8,244 (31.3)                                         |
|                               | <b>60-89</b>    | 1,801 (14.9)                                | 404 (21.4)                                 | 6,107 (23.4)                                         |
|                               | <b>≥ 90</b>     | 842 (7.0)                                   | 205 (10.8)                                 | 2,203 (8.4)                                          |
| <b>Moderate Hypernatremia</b> | <b>&lt;15</b>   | 166 (1.4)                                   | 27 (1.4)                                   | 326 (1.3)                                            |
|                               | <b>15-29</b>    | 467 (3.9)                                   | 70 (3.7)                                   | 743 (2.8)                                            |
|                               | <b>30-59</b>    | 1,150 (9.5)                                 | 116 (6.1)                                  | 1,334 (5.1)                                          |
|                               | <b>60-89</b>    | 899 (7.4)                                   | 68 (3.6)                                   | 873 (3.3)                                            |
|                               | <b>≥ 90</b>     | 482 (4.0)                                   | 45 (2.4)                                   | 359 (1.4)                                            |
| <b>Severe Hypernatremia</b>   | <b>&lt;15</b>   | 63 (0.5)                                    | 12 (0.6)                                   | 115 (0.4)                                            |
|                               | <b>15-29</b>    | 258 (2.1)                                   | 13 (0.7)                                   | 227 (0.9)                                            |
|                               | <b>30-59</b>    | 713 (5.9)                                   | 36 (1.9)                                   | 426 (1.6)                                            |
|                               | <b>60-89</b>    | 790 (6.5)                                   | 18 (1.0)                                   | 281 (1.1)                                            |
|                               | <b>≥ 90</b>     | 610 (5.0)                                   | 7 (0.4)                                    | 201 (0.8)                                            |

**Supplemental Table 2. Profile of serum sodium levels and outcomes stratified by kidney dysfunction status.**

| Natremia Status         | Kidney Function Status | In-Hospital Mortality (n=32,591) | Discharge to Hospice (n=11,818) | Discharge to Nursing Facility (n=178,887) |
|-------------------------|------------------------|----------------------------------|---------------------------------|-------------------------------------------|
|                         |                        | n (%)                            | n (%)                           | n (%)                                     |
| <b>NormoNa</b>          | <b>Normal</b>          | 11,719(69.9)                     | 6,720 (79.1)                    | 109,573 (84.0)                            |
|                         | <b>CKD</b>             | 429 (2.6)                        | 371 (4.4)                       | 5,766 (4.4)                               |
|                         | <b>AKI</b>             | 3,906 (23.3)                     | 1,021 (12.0)                    | 11,025 (8.5)                              |
|                         | <b>AKI on CKD</b>      | 707 (4.2)                        | 385 (4.5)                       | 4,019 (3.1)                               |
| <b>Mild HyperNa</b>     | <b>Normal</b>          | 3,310 (30.8)                     | 829 (47.5)                      | 12,343 (52.7)                             |
|                         | <b>CKD</b>             | 134 (1.2)                        | 74 (4.2)                        | 922 (3.9)                                 |
|                         | <b>AKI</b>             | 1,928 (17.9)                     | 321 (18.4)                      | 4,174 (17.8)                              |
|                         | <b>AKI on CKD</b>      | 358 (3.3)                        | 148 (8.5)                       | 1,596 (6.8)                               |
| <b>Moderate HyperNa</b> | <b>Normal</b>          | 1,561 (14.5)                     | 147 (8.4)                       | 1,706 (7.3)                               |
|                         | <b>CKD</b>             | 48 (0.4)                         | 9 (0.5)                         | 90 (0.4)                                  |
|                         | <b>AKI</b>             | 1,031 (9.6)                      | 107 (6.1)                       | 1,107 (4.7)                               |
|                         | <b>AKI on CKD</b>      | 185 (1.7)                        | 31 (1.8)                        | 367 (1.6)                                 |
| <b>Moderate HyperNa</b> | <b>Normal</b>          | 1,375 (12.8)                     | 32 (1.8)                        | 536 (2.3)                                 |
|                         | <b>CKD</b>             | 29 (0.3)                         | 7 (0.4)                         | 22 (0.1)                                  |
|                         | <b>AKI</b>             | 674 (6.3)                        | 31 (1.8)                        | 456 (1.9)                                 |
|                         | <b>AKI on CKD</b>      | 109 (1.0)                        | 8 (0.5)                         | 123 (0.5)                                 |

Footnote: CKD, chronic kidney disease; AKI, acute kidney injury; NormoNa, normonatremia; HyperNa, hypernatremia

**Supplemental Figure 1: Plot of relationships between serum sodium levels during hospital stay and length of hospitalization among those discharged to home stratified by eGFR.**

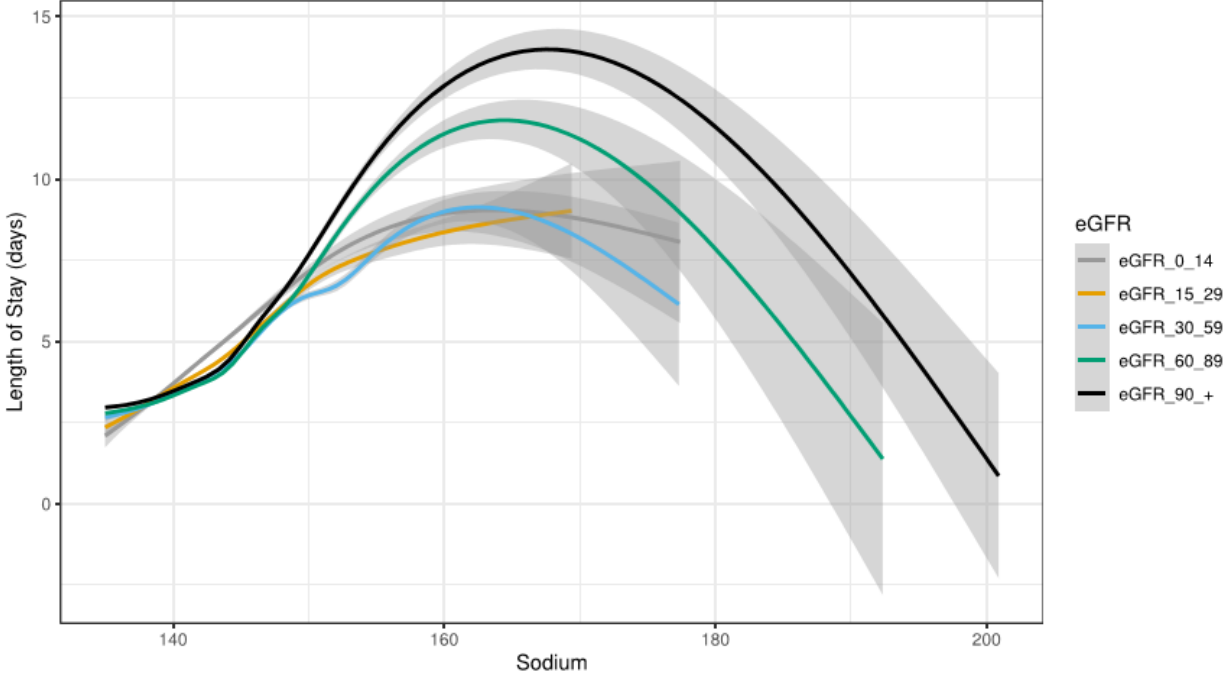

Supplement: cjasn-18-1396-s001.pdf [file cjasn-18-1396-s001.pdf]
